# Supplementary material
Source: PubMed Central journal article supplement (PMC4074287)
Supplement: supp_140.17.3589_DEV095471.pdf [file supp_140.17.3589_DEV095471.pdf]

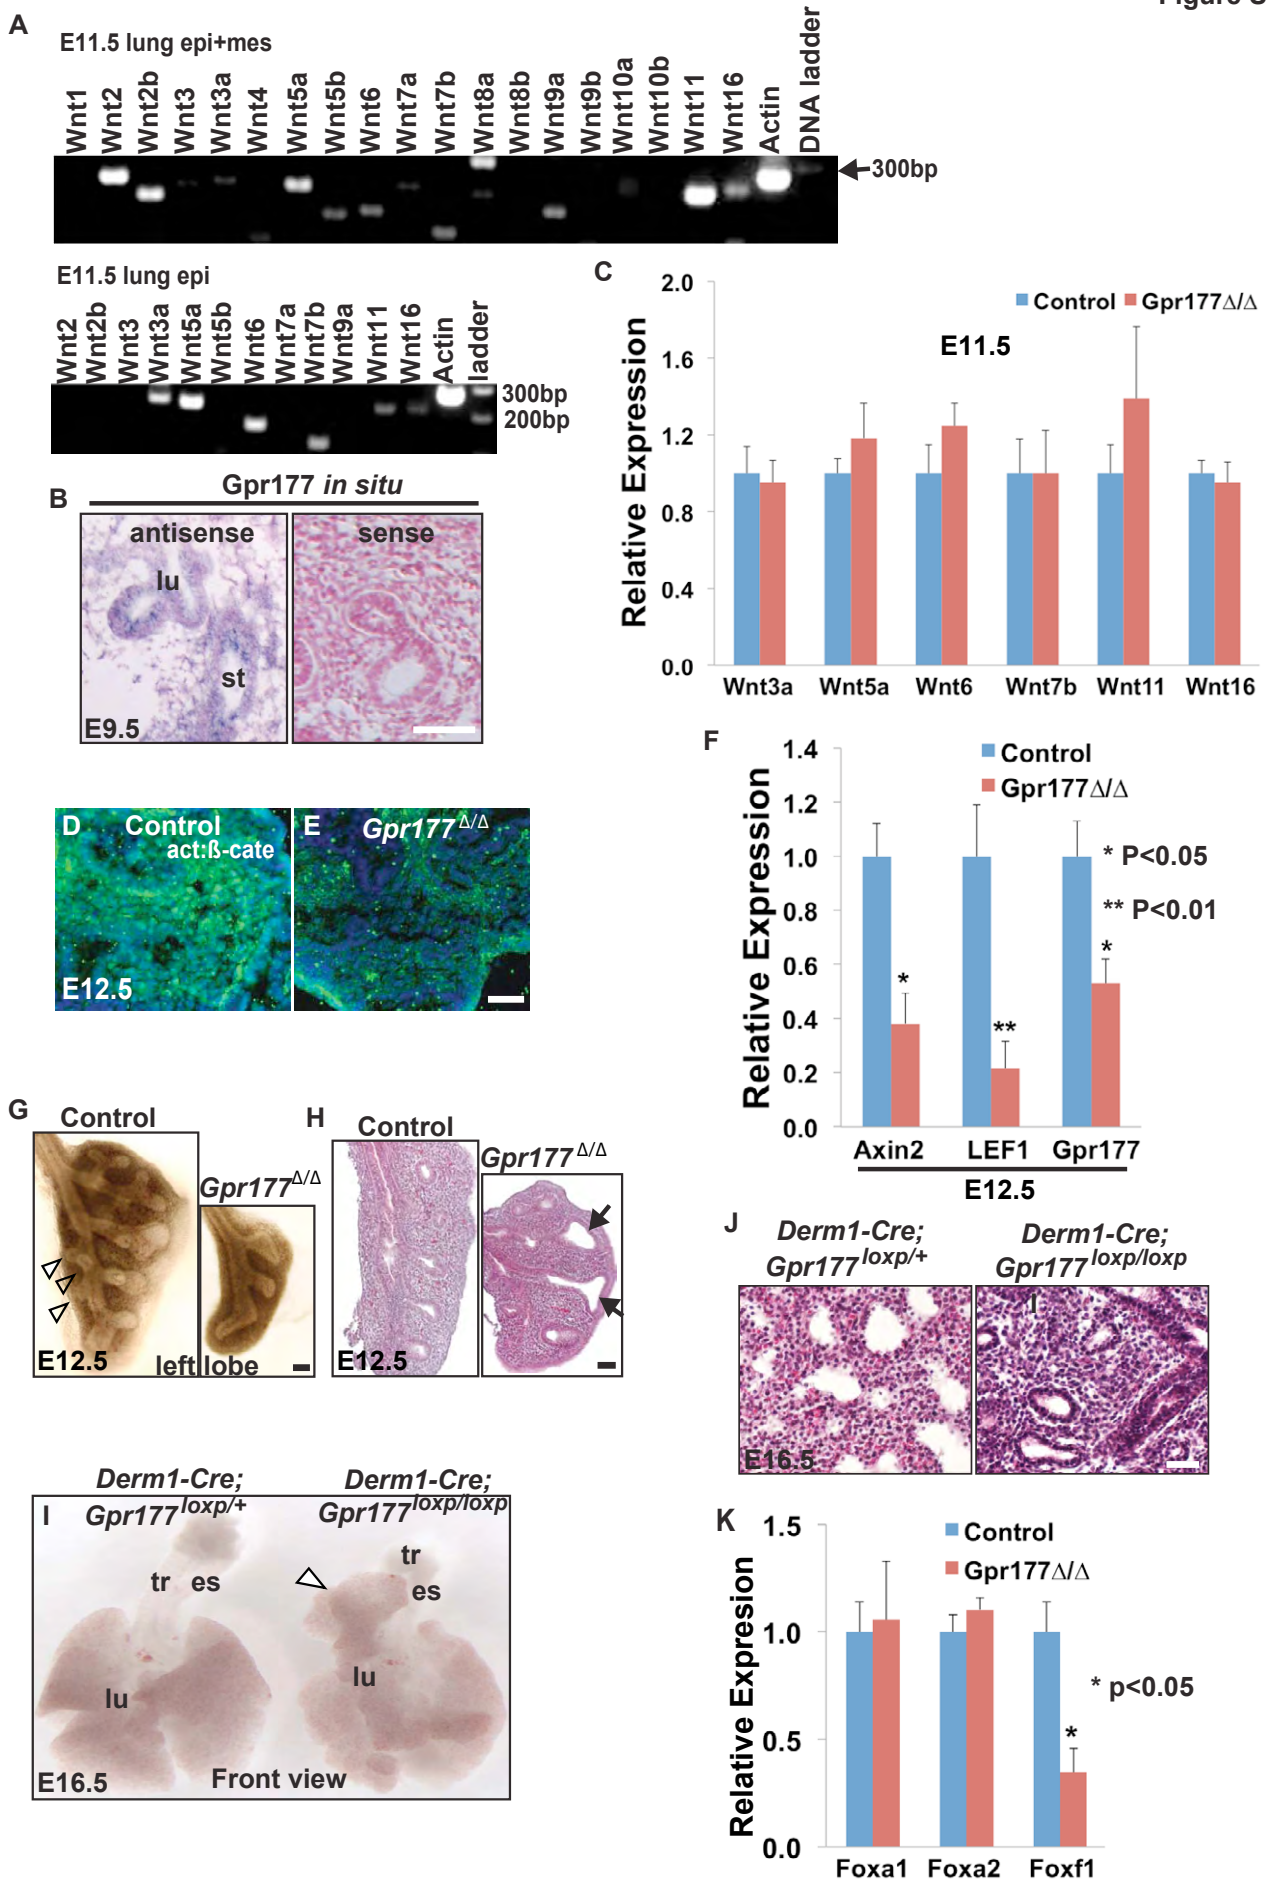

**Fig. S1. Deletion of epithelial *Gpr177* leads to lung morphogenesis defects.** (A) RT-PCR was used to examine the expression of Wnts in the E11.5 lung. Wnt2, Wnt2b, Wnt3a, Wnt5a, Wnt5b, Wnt6, Wnt7b, Wnt8a, Wnt9a, Wnt11 and Wnt16 are detected, and Wnt3a, Wnt5a, Wnt6, Wnt7b, Wnt11 and Wnt16 are enriched in the epithelium. (B) *Gpr177* is expressed ubiquitously in the E9.5 lung, as shown by *in situ* hybridization. (C) The transcript levels of lung epithelial Wnts are not affected by the removal of epithelial *Gpr177* in the E11.5 *Shh-Cre;Gpr177<sup>loxp/loxp</sup>* (*Gpr177<sup>Δ/Δ</sup>*) mutants. Quantitative real-time PCR was used, and the value was normalized to GAPDH. (D,E) The levels of activated  $\beta$ -catenin are reduced in the E12.5 *Gpr177<sup>Δ/Δ</sup>* mutant lungs. (F) Reduced mRNA levels of Wnt downstream targets Axin2 and Lef1 in the E12.5 mutant lung. The levels of *Gpr177* are also significantly reduced ( $P < 0.05$ ). The transcript levels were normalized against GAPDH mRNA. (G) Abnormal branching in the E12.5 mutant lung. Arrowheads indicate lateral secondary branching in the normal lung. The size of the mutant lung is reduced. (H) Dilated terminal airways in the mutant lung (arrows). (I) Deletion of *Gpr177* in the mesenchyme of the *Derm1-Cre;Gpr177<sup>loxp/loxp</sup>* mutants leads to abnormal lung branching morphogenesis. The arrowhead indicates the abnormal cranial lobe. (J) Hematoxylin and Eosin staining of the *Derm1-Cre;Gpr177<sup>loxp/loxp</sup>* mutant lung. Airways are enlarged and there is a lack of hemorrhage in the mutant lung. (K) The levels of *Foxf1* transcript are significantly reduced in the E16.5 lungs of *Shh-Cre;Gpr177<sup>loxp/loxp</sup>* mutants ( $P < 0.05$ ), while the levels of *Foxa1* and *Foxa2* are not significantly changed. Real-time PCR was used to measure the transcript levels. lu, lung; st, stomach; tr, trachea; es, esophagus. Scale bar: 50  $\mu$ m.

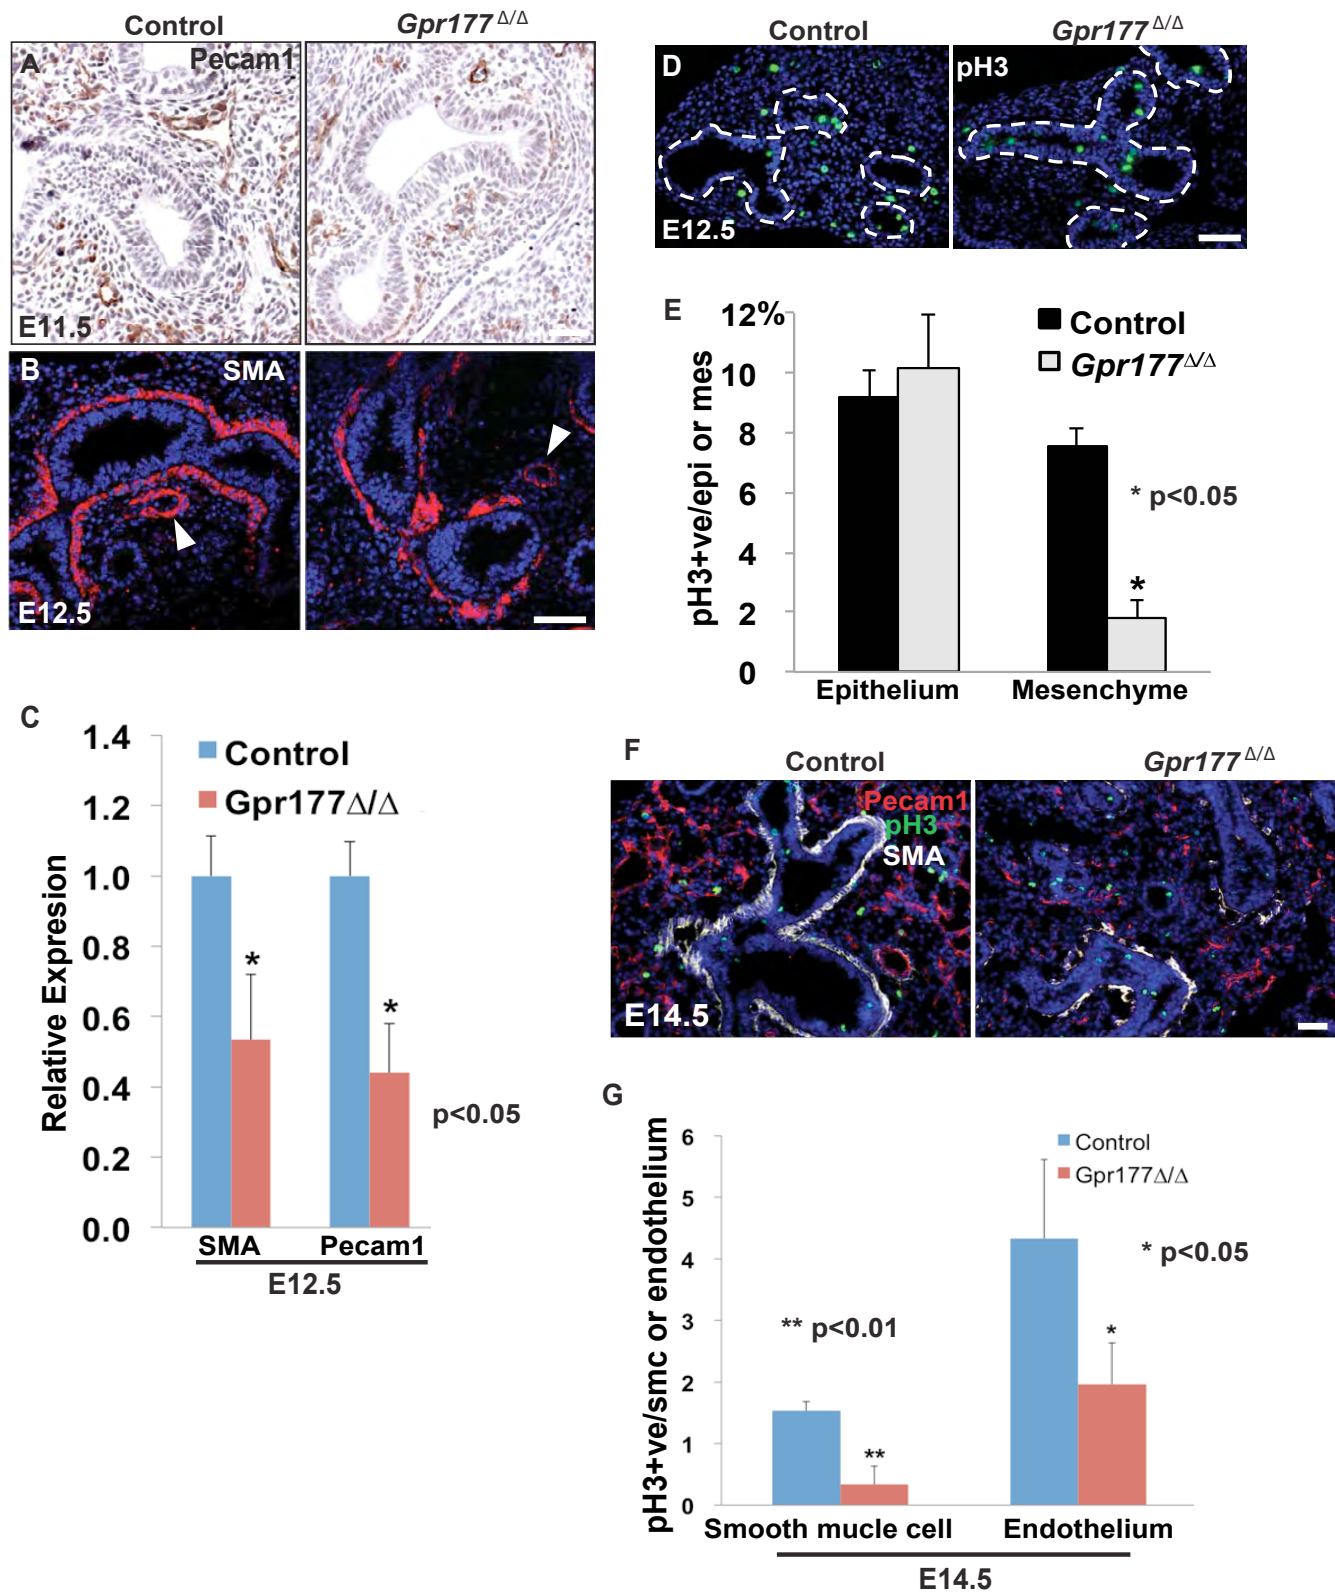

**Fig. S2. Decreased proliferation in the mesenchymal compartment contributes to the vasculature defects in *Gpr177*<sup>Δ/Δ</sup> mutants.** (A) Reduced number of blood vessels (Pecam1<sup>+</sup>) in the E11.5 *Gpr177*<sup>Δ/Δ</sup> mutant lung. (B) The number of smooth muscle cells surrounding the blood vessels (arrowhead) and airways is decreased in the E12.5 mutant lung. (C) The transcript levels of smooth muscle actin and Pecam1 are significantly decreased in the *Gpr177*<sup>Δ/Δ</sup> mutant lung ( $P < 0.05$ ). Real-time PCR was used to measure the transcript levels. (D) Representative sections stained with anti-pH3 antibody to show decreased proliferation of mesenchyme but not epithelium in the E12.5 mutant lung. (E) Quantification of proliferating cells in the E12.5 mutant and wild-type lungs. The data are presented as mean±s.e.m. (F,G) Reduced proliferation of smooth muscle and endothelial cells in the E14.5 *Gpr177*<sup>Δ/Δ</sup> mutant lungs. The data are presented as mean±s.e.m. Scale bar: 50  $\mu$ m.

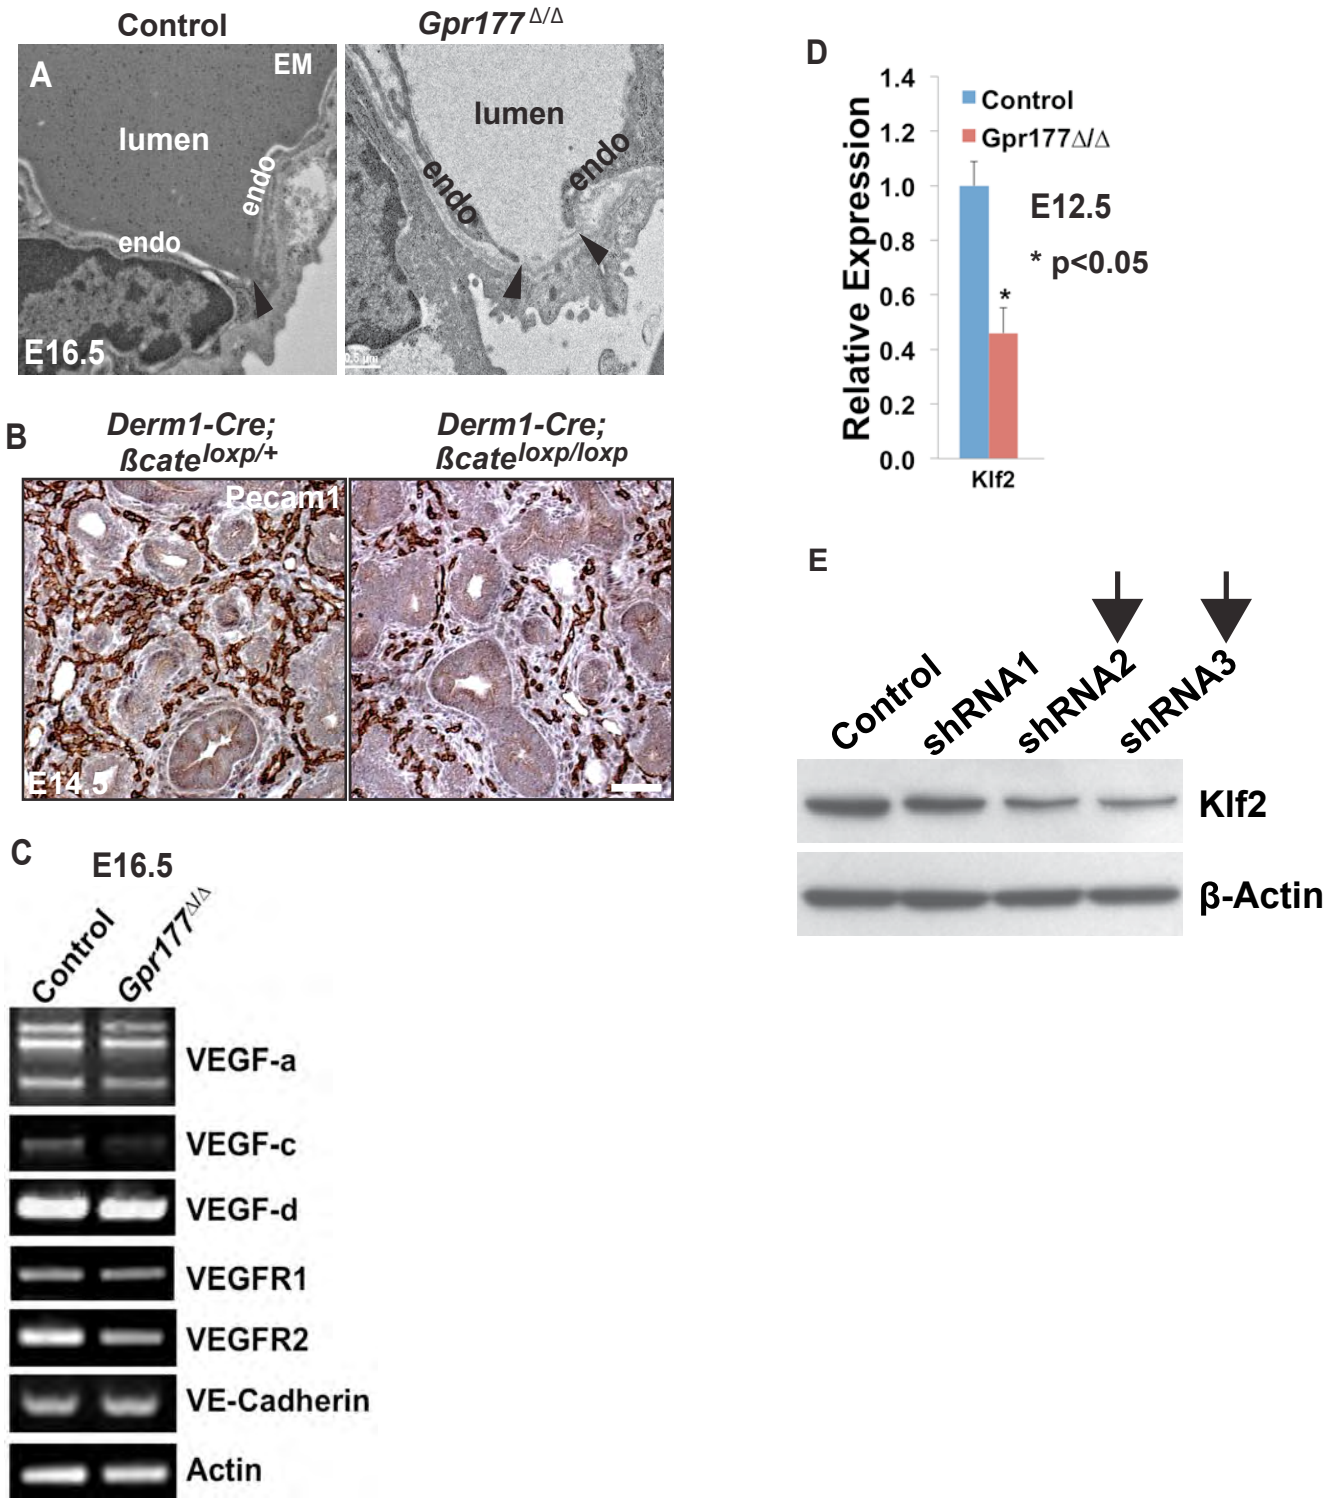

**Fig. S3. Downregulation of vascular factors in the *Gpr177* conditional mutant lungs.** (A) Deletion of *Gpr177* leads to thinning of the basement membrane and breakdown of tight junctions between endothelial cells, as revealed by electron microscopy. The arrowheads indicate the ends of two neighboring endothelial cells. (B)  $\beta$ -catenin deletion in the mesenchyme leads to reduced number of blood vessels in E14.5 *Derm1-Cre;β-cate*<sup>10xp/10xp</sup> mutants. (C) RT-PCR analysis shows the levels of VEGF-c are reduced in the E16.5 *Gpr177*<sup>Δ/Δ</sup> mutant lungs. (D) The transcript levels of Klf2 are significantly reduced in the E12.5 *Gpr177*<sup>Δ/Δ</sup> mutant lungs, as shown by qPCR. (E) Western blot analysis shows that the two shRNAs (shRNA2 and shRNA3) targeting different regions of Klf2 mRNA efficiently reduce the protein levels of Klf2 in PAC1 cells. endo, endothelium. Scale bar: 0.5  $\mu$ m in A; 50  $\mu$ m in B.

**Table S1. Primer sequences used to determine the transcripts expressed in the lungs of *Gpr177* conditional deletion mutants and controls**

| Gene            | Primer sequence 5'→3'     |
|-----------------|---------------------------|
| Wnt 1 forward   | 5-ATGAACCTTCACAACAACGAG-3 |
| Wnt 1 reverse   | GGTTGCTGCCTCGGTTG         |
| Wnt 2 forward   | CTGGCTCTGGCTCCCTCTG       |
| Wnt 2 reverse   | GGAAGTGGTGTGGCACTCTG      |
| Wnt 2b forward  | CGTTCGTCTATGCTATCTCGTCAG  |
| Wnt 2b reverse  | ACACCGTAATGGATGTTGTCCTAC  |
| Wnt 3 forward   | CAAGCACAACAATGAAGCAGGC    |
| Wnt 3 reverse   | TCGGGACTCACGGTGTCTCTC     |
| Wnt 3a forward  | CACCACCGTCAGCAACAGCC      |
| Wnt 3a reverse  | AGGAGCGTGTCCTGCGAAAG      |
| Wnt 4 forward   | GAGAAGTGTGGCTGTGACCGG     |
| Wnt 4 reverse   | ATGTTGTCCGAGCATCCTGACC    |
| Wnt 5a forward  | CTCCTTCGCCAGGTTGTTATAG    |
| Wnt 5a reverse  | TGTCTTCGCACCTTCTCCAATG    |
| Wnt 5b forward  | ATGCCCGAGAGCGTGAGAAG      |
| Wnt 5b reverse  | ACATTTGCAGGCGACATCAGC     |
| Wnt 6 forward   | TGCCCGAGGCGCAAGACTG       |
| Wnt 6 reverse   | ATTGCAAACACGAAAGCTGTCTCTC |
| Wnt 7a forward  | CGACTGTGGCTGCGACAAG       |
| Wnt 7a reverse  | CTTCATGTTCTCTCCAGGATCTTC  |
| Wnt 7b forward  | TCTCTGCTTTGGCGTCTCTAC     |
| Wnt 7b reverse  | GCCAGGCCAGGAATCTTGTTG     |
| Wnt 8a forward  | ACGGTGGAAATTGTCCTGAGCATG  |
| Wnt 8a reverse  | GATGGCAGCAGAGCGGATGG      |
| Wnt 8b forward  | TTGGGACCGTTGGAATTGCC      |
| Wnt 8b reverse  | AGTCATCACAGCCACAGTTGTC    |
| Wnt 9a forward  | GCAGCAAGTTTGTCAAGGAGTTCC  |
| Wnt 9a reverse  | GCAGGAGCCAGACACACCATG     |
| Wnt 9b forward  | AAGTACAGCACCAAGTTCCTCAGC  |
| Wnt 9b reverse  | GAACAGCACAGGAGCCTGACAC    |
| Wnt 10a forward | CCTGTTCTTCTACTGCTGCTGG    |
| Wnt 10a reverse | CGATCTGGATGCCCTGGATAGC    |
| Wnt 10b forward | TTCTCTCGGGATTTCTTGATTC    |
| Wnt 10b reverse | TGCACTTCCGCTTCAGGTTTTC    |
| Wnt 11 forward  | CTGAATCAGACGCAACTGTAAAC   |
| Wnt 11 reverse  | CTCTCTCCAGGTCAAGCAGGTAG   |
| Wnt 16 forward  | AGTAGCGGCACCAAGGAGAC      |

|                     |                           |
|---------------------|---------------------------|
| Wnt 16 reverse      | GAAACTTTCTGCTGAACCCACATGC |
| Axin2 forward       | CAGCCCTTGTGGTTCAAGCT      |
| Axin2 reverse       | GGTAGATTCCTGATGGCCGTAGT   |
| LEF1 forward        | GCAGCTATCAACCAGATCC       |
| LEF1 reverse        | GATGTAGGCAGCTGTCATTC      |
| Gpr177 forward      | TGTTGGAGGGATTCTTCTGG      |
| Gpr177 reverse      | ATTGCCGTGTAGGGTACTGC      |
| Foxa1 forward       | CCCTTTCTCCCTTTCCTCC       |
| Foxa1 reverse       | AGGGCTCCAATGTGCATAAC      |
| Foxa2 forward       | CCATCCAGCAGAGCCCCAACA     |
| Foxa2 reverse       | GTCTGGGTGCAGGGTCCAGAA     |
| Foxf1 forward       | GGCCTCCTACATCAAGCAAC      |
| Foxf1 reverse       | TAAGATCCTCCGCCTGTTGT      |
| SMA forward         | GGTCGTGGAGTTGGTGGAAA      |
| SMA reverse         | CTGCCATGTCCTCCACCTTAG     |
| Pecam1 forward      | TCCCTGGGAGGTCGTCCAT       |
| Pecam1 reverse      | GAACAAGGCAGCGGGGTTTA      |
| Klf2 forward        | GCCTGTGGGTTTCGTATAAA      |
| Klf2 reverse        | TTTCCCACTTGGGATACAGG      |
| VEGF-a forward      | GATCATGCGGATCAAACCTCACC   |
| VEGF-a reverse      | CCTCCGGACCCAAAGTGCTC      |
| VEGF-c forward      | AACGTGTCCAAGAAATCAGCC     |
| VEGF-c reverse      | AGTCCTCTCCCGCAGTAATCC     |
| VEGF-d forward      | GGTCCATGTTGGAACGATCT      |
| VEGF-d reverse      | ATGCTGAGCGTGAGTCCATA      |
| VEGFR1 forward      | CAACGTACAAAGAGATAGGACTGCT |
| VEGFR1 reverse      | TTTGGACATCTAGGATTGTATTGGT |
| VEGFR2 forward      | CGAAATTACTTTTTAGCCGAGGT   |
| VEGFR2 reverse      | TTAACATAAGCACACAGGCAGAA   |
| VE-Cadherin forward | GGATGCAGAGGCTCACAGAGCTGG  |
| VE-Cadherin reverse | CTTAGCATTCTGGCGGTTACGTT   |
| Actin forward       | GACGGCCAGGTCATCACTAT      |
| Actin reverse       | GTACTIONGCGCTCAGGAGGAG    |
